# Supplementary material for: The impact of radical loading and oxidation on the conformation of organic radical polymers by small angle neutron scattering
Source: Royal Society of Chemistry journal article supplement (doi:10.1039/c8ta04583f), 2018-01-01
Supplement: c8ta04583f1.pdf [file c8ta04583f1.pdf]

## The Impact of Radical Loading and Oxidation on the Conformation of Organic Radical Polymers by Small Angle Neutron Scattering

Halie J. Martin, Barbara Hughes, Wade A. Braunecker, Thomas Gennett, and Mark D. Dadmun

### Supplementary Materials

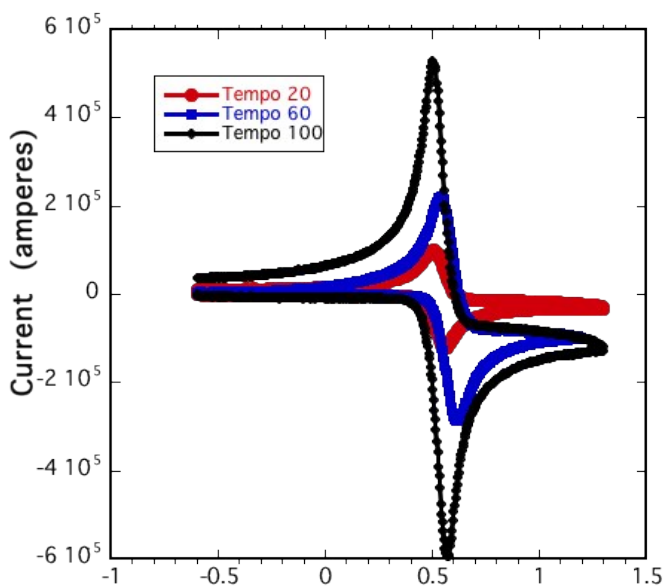

Supplemental Figure S1: Representative CVs of PTMA-20 (red circles), PTMA-60 (blue squares), and PTMA-100 (black diamonds).

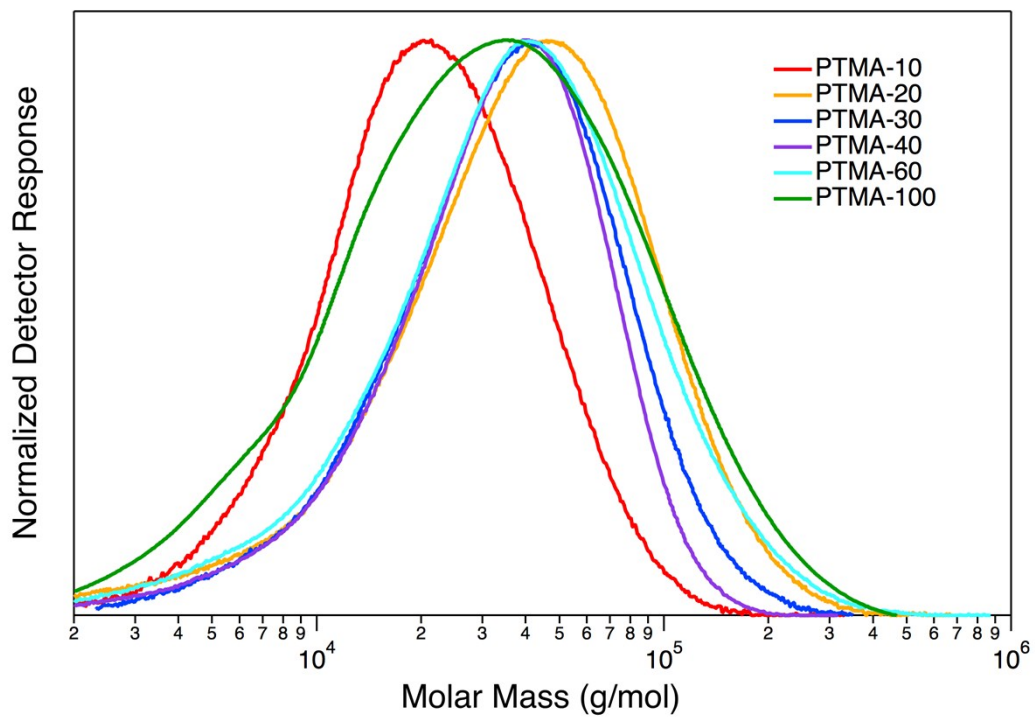

Supplemental Figure S2: GPC traces of PTMA samples.
